# Supplementary material for: Secondhand Smoke Exposure and Smoking Prevalence Among Adolescents
Source: PubMed Central journal article supplement (PMC10589809; doi:10.1001/jamanetworkopen.2023.38166), 2023-10-20
Supplement: jamanetwopen-e2338166-s003.pdf [file jamanetwopen-e2338166-s003.pdf]

## Data Sharing Statement

Kuwabara. Secondhand Smoke Exposure and Smoking Prevalence Among Adolescents in Japan. *JAMA Netw Open*. Published October 20, 2023.  
doi:10.1001/jamanetworkopen.2023.38166

### Data

**Data available:** No. The datasets generated and/or analyzed during this study are not publicly available because of the lack of consensus from other research members but are available from the corresponding author upon reasonable request.
